# Supplementary material for: Enhancing the detection of barcoded reads in high throughput DNA sequencing data by controlling the false discovery rate
Source: PubMed Central journal article supplement (PMC4133078; doi:10.1186/1471-2105-15-264), 2014-08-07
Supplement: 12859_2013_6528_MOESM1_ESM.pdf [file 12859_2013_6528_MOESM1_ESM.pdf]

# Dynamic Algorithm of Sequence-Levenshtein distance

---

**Algorithm 1** Sequence-Levenshtein Distance

---

```
1: function SEQUENCELEVENSHTEINDISTANCE(Sequence1, Sequence2)
2:   l1 ← LENGTH(Sequence1)
3:   l2 ← LENGTH(Sequence2)
4:   declare distances : array[l1 + 1][l2 + 1]
5:   for i ← 0, l1 do
6:     distances[i][0] ← i
7:   end for
8:   for j ← 0, l2 do
9:     distances[0][j] ← j
10:  end for

11:  for i ← 1, l1 do
12:    for j ← 1, l2 do
13:      if s1[i - 1] = s2[j - 1] then
14:        cost ← 0
15:      else
16:        cost ← 1
17:      end if
18:      distances[i][j] ← MINIMUM(
        ▷ Substitution
        distances[i - 1][j - 1] + cost,
        ▷ Insertion
        distances[i][j - 1] + 1,
        ▷ Deletion
        distances[i - 1][j] + 1)
19:    end for
20:  end for
21:  min_distance ← distances[l1][l2]

22:  ▷ Sequence-Levenshtein extension
23:  ▷ Truncation
24:  for i ← 0, l1 do
25:    min_distance ← MINIMUM(min_distance, distances[i][l2])
26:  end for
27:  ▷ Elongation
28:  for j ← 0, l2 do
29:    min_distance ← MINIMUM(min_distance, distances[l1][j])
30:  end for
31:  return min_distance
32: end function
```

---
