# Supplementary material for: Enhancing the detection of barcoded reads in high throughput DNA sequencing data by controlling the false discovery rate
Source: PubMed Central journal article supplement (PMC4133078; doi:10.1186/1471-2105-15-264), 2014-08-07
Supplement: 12859_2013_6528_MOESM2_ESM.pdf [file 12859_2013_6528_MOESM2_ESM.pdf]

# Supplement

Section S1 is a verbatim excerpt of the Sequence-Levenshtein distance definition as outlined in our previous work [1].

## S1 Sequence-Levenshtein Distance

We adapted the Levenshtein distances in such a way that the DNA context is taken into account and the length of the new mutated barcode in the sequence read is correctly identified. In the worst case, any barcode embedded in the sequence read will be surrounded by the sample sequence such that it decreases its distance to other sequences in the set.

The Sequence-Levenshtein distance between two arbitrary words A and B is the minimum number of the following three operations:

- Substitutions
- Deletions
- Insertions

which results in word  $\bar{A}$ , finalized by applying one of the following operations exactly once:

- Truncating  $\bar{A}$  to match the length of B
- Elongating  $\bar{A}$  to match the length and bases of B

The latter two operations do not increase the distance between A and B. It follows, that the distance between A and B is 0 if A is a prefix of B (and vice versa). For the purpose of this distance metric, we define in this case A to be equal to B.

The formal definition of our metric allowed us to prove that the Sequence-Levenshtein distance is indeed a “distance metric”, so that codes based on this distance can correct  $k$  substitutions and indels in DNA context if their minimum distance is at least  $d_{SL}^{min} = 2 * k + 1$ .

## S2 List of Experimental Barcodes

|         |         |         |
|---------|---------|---------|
| CCTGTAA | ACCGTTA | ATGCCTA |
| TTGCAGA | GGATTGT | CAAGTCA |
| GATCGAA | TACTGGA | CGGTATA |
| CTCTAGA | TCAAGGA | CCAACAA |
| GGAAGAA | GAAGCTT | CAGAGAA |
| CACCTAA | TAGCCAA | ACCAGAA |
| TGGAGTA | GCGATAA |         |

## S3 List of Experimental Primers

Forward (Fw) and Reverse (Rw) experimental barcoded primers.

|                                |                                |
|--------------------------------|--------------------------------|
| Fw CCTGTAAGGGAGCTGCTCTCTTCTCTT | Fw GATCGAAGGGAGCTGCTCTCTTCTCTT |
| Rw CCTGTAATATAAACCTTGCCCGCTGTC | Rw GATCGAATATAAACCTTGCCCGCTGTC |
| Fw TTGCAGAGGGAGCTGCTCTCTTCTCTT | Fw CTCTAGAGGGAGCTGCTCTCTTCTCTT |
| Rw TTGCAGATATAAACCTTGCCCGCTGTC | Rw CTCTAGATATAAACCTTGCCCGCTGTC |

|                                |                                |
|--------------------------------|--------------------------------|
| Fw GGAAGAAGGGAGCTGCTCTCTTCTCTT | Fw TAGCCAAGGGAGCTGCTCTCTTCTCTT |
| Rw GGAAGAATATAAACCTTGCCCGCTGTC | Rw TAGCCAATATAAACCTTGCCCGCTGTC |
| Fw CACCTAAGGGAGCTGCTCTCTTCTCTT | Fw GCGATAAGGGAGCTGCTCTCTTCTCTT |
| Rw CACCTAATATAAACCTTGCCCGCTGTC | Rw GCGATAATATAAACCTTGCCCGCTGTC |
| Fw TGGAGTAGGGAGCTGCTCTCTTCTCTT | Fw ATGCCTAGGGAGCTGCTCTCTTCTCTT |
| Rw TGGAGTATATAAACCTTGCCCGCTGTC | Rw ATGCCTATATAAACCTTGCCCGCTGTC |
| Fw ACCGTTAGGGAGCTGCTCTCTTCTCTT | Fw CAAGTCAGGGAGCTGCTCTCTTCTCTT |
| Rw ACCGTTATATAAACCTTGCCCGCTGTC | Rw CAAGTCATATAAACCTTGCCCGCTGTC |
| Fw GGATTGTGGGAGCTGCTCTCTTCTCTT | Fw CGGTATAGGGAGCTGCTCTCTTCTCTT |
| Rw GGATTGTATAAACCTTGCCCGCTGTC  | Rw CGGTATATATAAACCTTGCCCGCTGTC |
| Fw TACTGGAGGGAGCTGCTCTCTTCTCTT | Fw CCAACAAGGGAGCTGCTCTCTTCTCTT |
| Rw TACTGGATATAAACCTTGCCCGCTGTC | Rw CCAACAATATAAACCTTGCCCGCTGTC |
| Fw TCAAGGAGGGAGCTGCTCTCTTCTCTT | Fw CAGAGAAGGGAGCTGCTCTCTTCTCTT |
| Rw TCAAGGATATAAACCTTGCCCGCTGTC | Rw CAGAGAATATAAACCTTGCCCGCTGTC |
| Fw GAAGCTTGGGAGCTGCTCTCTTCTCTT | Fw ACCAGAAGGGAGCTGCTCTCTTCTCTT |
| Rw GAAGCTTTATAAACCTTGCCCGCTGTC | Rw ACCAGAATATAAACCTTGCCCGCTGTC |

## S4 Variant Calling Parameters

### S4.1 BWA-SW

The call to bwa-mem [2] was as follows:

```
bwa mem -t 16 -B 2 -O 2 -E 1 refMrna.fa <sample.fasta> -f <sample.sam>
```

### S4.2 Samtools

The call to samtools [3] was as follows:

```
samtools mpileup -E -d10000000 -uf refMrna.fa <sample.bam>
```

## S5 Coincidental Similarities to Mus Musculus DNA Database

Figure 1 gives more examples of the frequency distributions of Figure 1 (A) in the main manuscript.

Figure 2 extends Figure 1 (C) of the main manuscript by depicting the proportion of subsequences that are detected to be barcoded based on different thresholds.

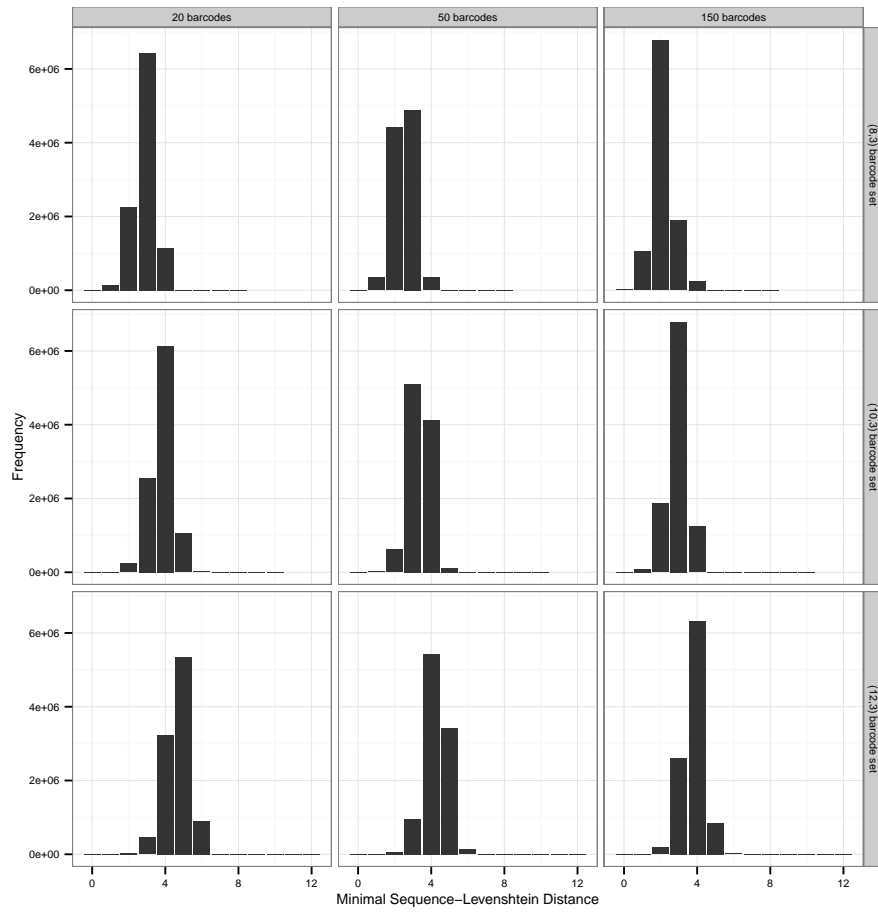

Figure 1: Similarities between 10 million random subsequences of the *Mus Musculus* DNA Database and Barcode Sets of sizes 20, 50, and 150 and lengths 8nt, 10nt, and 12nt. The figure expands on Figure 1 (A) of the main manuscript, providing more examples of frequency distributions.

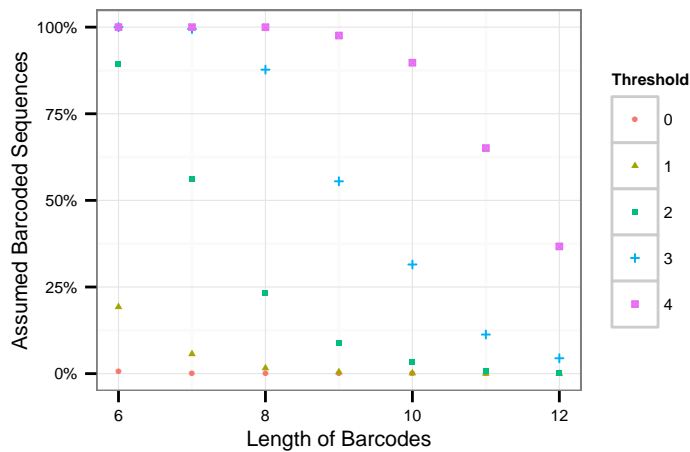

Figure 2: Proportion of sequences detected as starting with a barcode, depending on length of the barcodes to which they are compared. In a comparison of 1 Mio subsequences of the *Mus Musculus* DNA database with sets of 20 barcodes of different lengths, we found that longer barcodes show less incidences of coincidental similarities.

## S6 Variant Call Results

| Clone   | Base | Mutation | Position | Phred Quality Score | DP4 sum |
|---------|------|----------|----------|---------------------|---------|
| ACCAGAA | C    | T        | 2704     | 225                 | 768     |
| ACCGTTA | G    | C        | 675      | 225                 | 1020    |
| ATGCCTA | T    | A        | 2674     | 225                 | 717     |
| ATGCCTA | A    | T        | 2676     | 225                 | 662     |
| CAAGTCA | G    | C        | 675      | 225                 | 1244    |
| CACCTAA | C    | T        | 2704     | 225                 | 720     |
| CAGAGAA | C    | T        | 2704     | 225                 | 782     |
| CCAACAA | C    | T        | 2704     | 225                 | 849     |
| CCTGTAA | C    | T        | 2704     | 225                 | 1188    |
| CGGTATA | G    | C        | 675      | 225                 | 549     |
| CTCTAGA | A    | G        | 676      | 225                 | 1386    |
| GAAGCTT | T    | C        | 2692     | 225                 | 593     |
| GATCGAA | C    | T        | 2704     | 225                 | 966     |
| GCGATAA | T    | A        | 2674     | 225                 | 195     |
| GCGATAA | A    | T        | 2676     | 225                 | 184     |
| GGAAGAA | G    | A        | 675      | 225                 | 735     |
| GGATTGT | G    | C        | 675      | 225                 | 694     |
| TACTGGA | C    | T        | 2704     | 225                 | 979     |
| TAGCCAA | G    | C        | 675      | 225                 | 1585    |
| TCAAGGA | G    | C        | 675      | 225                 | 804     |
| TGGAGTA | C    | T        | 2704     | 225                 | 575     |
| TTGCAGA | C    | T        | 2704     | 225                 | 700     |

Table S 1: Single Nucleotide Variants in Experimental Data

## S7 Detection Tables

| distance | fdr     | recall | source            |
|----------|---------|--------|-------------------|
| 0        | 0.00613 | 0.456  | [7,3] barcode set |
| 1        | 0.10791 | 0.830  | [7,3] barcode set |
| 2        | 0.47512 | 0.982  | [7,3] barcode set |
| 3        | 0.64653 | 1.000  | [7,3] barcode set |
| 4        | 0.66007 | 1.000  | [7,3] barcode set |

| distance | fdr        | recall | source                         |
|----------|------------|--------|--------------------------------|
| 0        | 0.00e + 00 | 0.0862 | 27-nt-long barcoded PCR Primer |
| 1        | 0.00e + 00 | 0.2389 | 27-nt-long barcoded PCR Primer |
| 2        | 3.28e - 05 | 0.4400 | 27-nt-long barcoded PCR Primer |
| 3        | 4.55e - 05 | 0.6352 | 27-nt-long barcoded PCR Primer |
| 4        | 7.30e - 05 | 0.7915 | 27-nt-long barcoded PCR Primer |
| 5        | 1.29e - 04 | 0.8959 | 27-nt-long barcoded PCR Primer |
| 6        | 1.81e - 04 | 0.9558 | 27-nt-long barcoded PCR Primer |
| 7        | 7.78e - 04 | 0.9832 | 27-nt-long barcoded PCR Primer |
| 8        | 6.52e - 03 | 0.9945 | 27-nt-long barcoded PCR Primer |
| 9        | 3.18e - 02 | 0.9985 | 27-nt-long barcoded PCR Primer |
| 10       | 1.14e - 01 | 0.9996 | 27-nt-long barcoded PCR Primer |
| 11       | 2.79e - 01 | 0.9999 | 27-nt-long barcoded PCR Primer |
| 12       | 4.60e - 01 | 1.0000 | 27-nt-long barcoded PCR Primer |
| 13       | 5.81e - 01 | 1.0000 | 27-nt-long barcoded PCR Primer |
| 14       | 6.36e - 01 | 1.0000 | 27-nt-long barcoded PCR Primer |
| 15       | 6.55e - 01 | 1.0000 | 27-nt-long barcoded PCR Primer |
| 16       | 6.59e - 01 | 1.0000 | 27-nt-long barcoded PCR Primer |
| 17       | 6.60e - 01 | 1.0000 | 27-nt-long barcoded PCR Primer |
| 18       | 6.60e - 01 | 1.0000 | 27-nt-long barcoded PCR Primer |
| 19       | 6.60e - 01 | 1.0000 | 27-nt-long barcoded PCR Primer |

## S8 Sequence Assignment Tables

| distance | recall | fdr     | source            |
|----------|--------|---------|-------------------|
| 0        | 0.153  | 0.00607 | [7,3] barcode set |
| 1        | 0.279  | 0.11476 | [7,3] barcode set |
| 2        | 0.310  | 0.38913 | [7,3] barcode set |
| 3        | 0.312  | 0.43963 | [7,3] barcode set |
| 4        | 0.312  | 0.44016 | [7,3] barcode set |

| distance | recall | fdr     | source                         |
|----------|--------|---------|--------------------------------|
| 0        | 0.0291 | 0.00000 | 27-nt-long barcoded PCR Primer |
| 1        | 0.0814 | 0.00157 | 27-nt-long barcoded PCR Primer |
| 2        | 0.1490 | 0.00381 | 27-nt-long barcoded PCR Primer |
| 3        | 0.2114 | 0.00650 | 27-nt-long barcoded PCR Primer |
| 4        | 0.2581 | 0.00934 | 27-nt-long barcoded PCR Primer |
| 5        | 0.2873 | 0.01170 | 27-nt-long barcoded PCR Primer |
| 6        | 0.3025 | 0.01322 | 27-nt-long barcoded PCR Primer |
| 7        | 0.3088 | 0.01455 | 27-nt-long barcoded PCR Primer |
| 8        | 0.3111 | 0.01918 | 27-nt-long barcoded PCR Primer |
| 9        | 0.3121 | 0.03615 | 27-nt-long barcoded PCR Primer |
| 10       | 0.3133 | 0.08761 | 27-nt-long barcoded PCR Primer |
| 11       | 0.3153 | 0.17971 | 27-nt-long barcoded PCR Primer |
| 12       | 0.3182 | 0.28458 | 27-nt-long barcoded PCR Primer |
| 13       | 0.3208 | 0.35370 | 27-nt-long barcoded PCR Primer |
| 14       | 0.3221 | 0.38250 | 27-nt-long barcoded PCR Primer |
| 15       | 0.3225 | 0.39038 | 27-nt-long barcoded PCR Primer |
| 16       | 0.3225 | 0.39165 | 27-nt-long barcoded PCR Primer |
| 17       | 0.3225 | 0.39174 | 27-nt-long barcoded PCR Primer |
| 18       | 0.3225 | 0.39176 | 27-nt-long barcoded PCR Primer |
| 19       | 0.3225 | 0.39176 | 27-nt-long barcoded PCR Primer |

## S9 Read Assignment Tables

| distance | fdr     | recall | source            |
|----------|---------|--------|-------------------|
| 0        | 0.00596 | 0.281  | [7,3] barcode set |
| 1        | 0.09711 | 0.471  | [7,3] barcode set |
| 2        | 0.25506 | 0.493  | [7,3] barcode set |
| 3        | 0.25909 | 0.494  | [7,3] barcode set |
| 4        | 0.25909 | 0.494  | [7,3] barcode set |

| distance | fdr     | recall | source                         |
|----------|---------|--------|--------------------------------|
| 0        | 0.00000 | 0.0542 | 27-nt-long barcoded PCR Primer |
| 1        | 0.00214 | 0.1508 | 27-nt-long barcoded PCR Primer |
| 2        | 0.00473 | 0.2667 | 27-nt-long barcoded PCR Primer |
| 3        | 0.00699 | 0.3709 | 27-nt-long barcoded PCR Primer |
| 4        | 0.00950 | 0.4452 | 27-nt-long barcoded PCR Primer |
| 5        | 0.01156 | 0.4886 | 27-nt-long barcoded PCR Primer |
| 6        | 0.01300 | 0.5098 | 27-nt-long barcoded PCR Primer |
| 7        | 0.01390 | 0.5189 | 27-nt-long barcoded PCR Primer |
| 8        | 0.01763 | 0.5219 | 27-nt-long barcoded PCR Primer |
| 9        | 0.03048 | 0.5232 | 27-nt-long barcoded PCR Primer |
| 10       | 0.06988 | 0.5245 | 27-nt-long barcoded PCR Primer |
| 11       | 0.13271 | 0.5265 | 27-nt-long barcoded PCR Primer |
| 12       | 0.18867 | 0.5287 | 27-nt-long barcoded PCR Primer |
| 13       | 0.21047 | 0.5298 | 27-nt-long barcoded PCR Primer |
| 14       | 0.21429 | 0.5299 | 27-nt-long barcoded PCR Primer |
| 15       | 0.21456 | 0.5299 | 27-nt-long barcoded PCR Primer |
| 16       | 0.21456 | 0.5299 | 27-nt-long barcoded PCR Primer |

## References

- [1] Tilo Buschmann and Leonid V. Bystrykh. Levenshtein error-correcting barcodes for multiplexed dna sequencing. Unpublished, 2013.
- [2] Heng Li and Richard Durbin. Fast and accurate long-read alignment with Burrows-Wheeler transform. *Bioinformatics*, 26(5):589–595, March 2010.
- [3] Heng Li, Bob Handsaker, Alec Wysoker, Tim Fennell, Jue Ruan, Nils Homer, Gabor Marth, Goncalo Abecasis, and Richard Durbin. The sequence Alignment/Map format and SAMtools. *Bioinformatics*, 25(16):2078–2079, August 2009.
