# Supplementary material for: Enhancing the detection of barcoded reads in high throughput DNA sequencing data by controlling the false discovery rate
Source: PubMed Central journal article supplement (PMC4133078; doi:10.1186/1471-2105-15-264), 2014-08-07

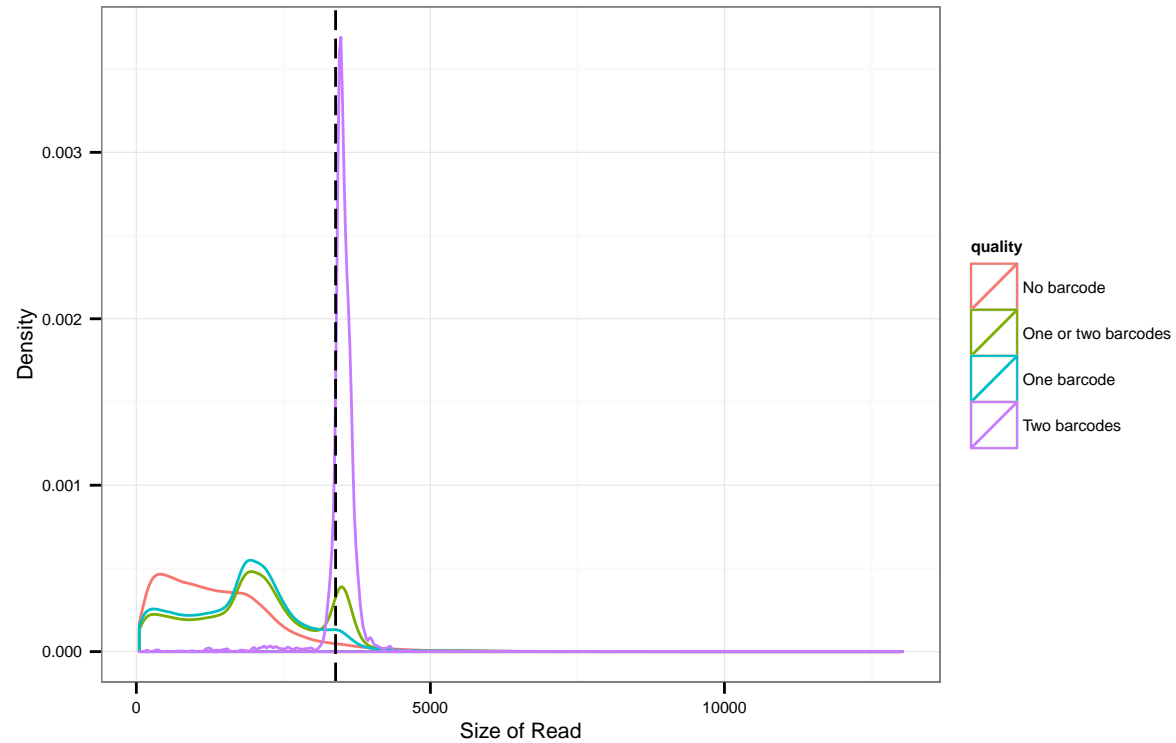

Supplement: 12859_2013_6528_MOESM3_ESM.pdf [file 12859_2013_6528_MOESM3_ESM.pdf]
