# Supplementary material for: Enhancing the detection of barcoded reads in high throughput DNA sequencing data by controlling the false discovery rate
Source: PubMed Central journal article supplement (PMC4133078; doi:10.1186/1471-2105-15-264), 2014-08-07
Supplement: 12859_2013_6528_MOESM5_ESM.pdf [file 12859_2013_6528_MOESM5_ESM.pdf]

NM\_144900

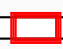

41 bp

660 bp

670 bp

680 bp

690 bp

$\delta_t = 1$

ACCAGAA\_sorted.bam

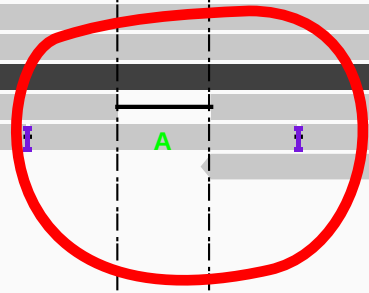

$\delta_t = 9$

ACCAGAA\_sorted.bam

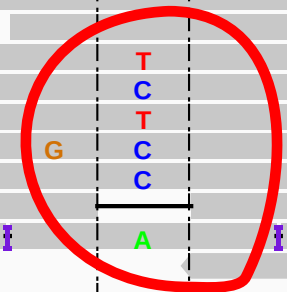

$\delta_t = 16$

ACCAGAA\_sorted.bam

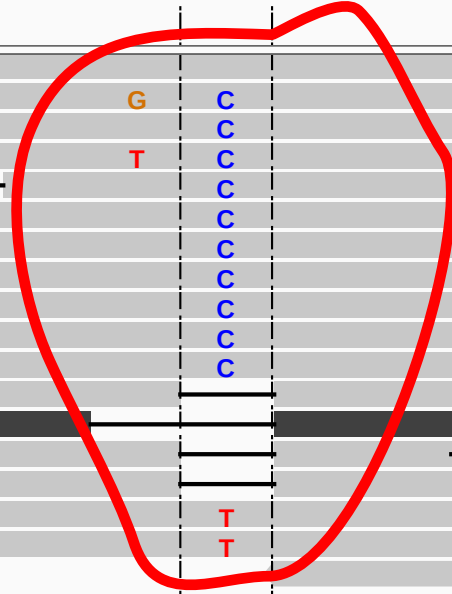

Sequence →

c a g a a g a g g a a c c g c c a a a c g a t g a t c t g t a c c t c g g g g t g
